# Supplementary material for: Development of a D–π–A pyrazinium photosensitizer possessing singlet oxygen generation
Source: Royal Society of Chemistry journal article supplement (doi:10.1039/c5ra26647e), 2016-01-01
Supplement: c5ra26647e1.pdf [file c5ra26647e1.pdf]

## Supplementary Information

### Development of D- $\pi$ -A pyrazinium photosensitizer possessing singlet oxygen generation

Yousuke Ooyama,<sup>\*</sup> Toshiaki Enoki and Joji Ohshita<sup>\*</sup>

*Department of Applied Chemistry, Graduate School of Engineering, Hiroshima University,  
Higashi-Hiroshima, 739-8527, Japan.*

*Fax: +81 824 24 5494; Tel: +81 824 24 7689; E-mail:yooyama@hiroshima-u.ac.jp*

(a)

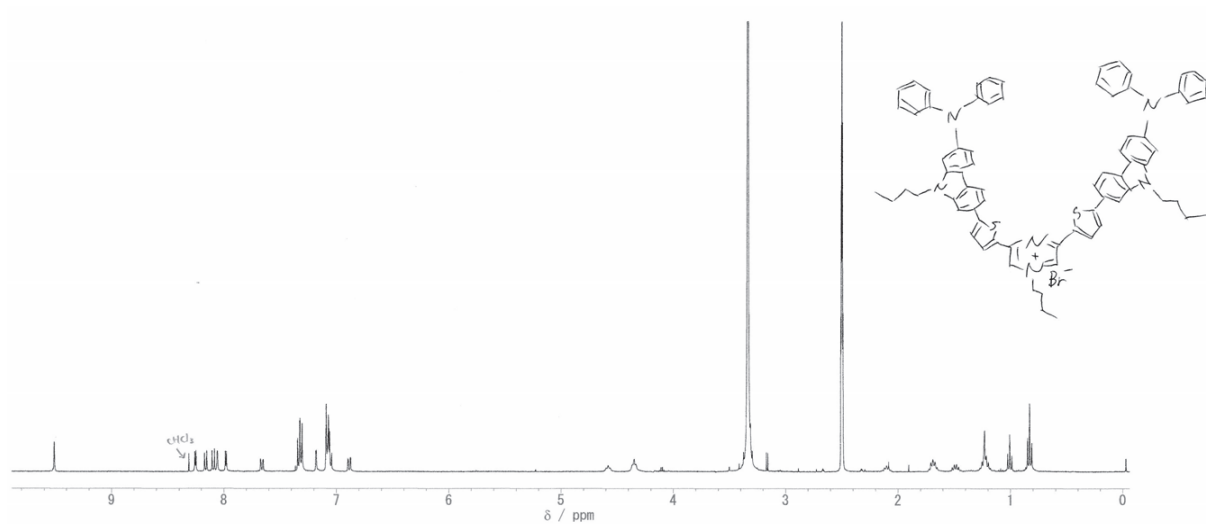

(b)

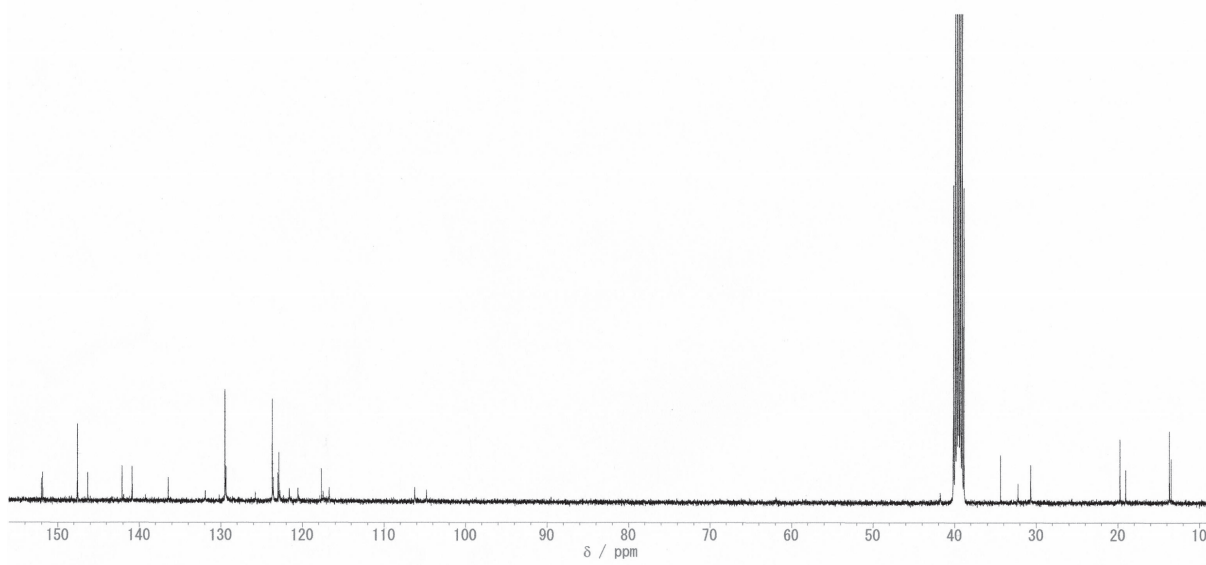

**Fig. S1** (a) <sup>1</sup>H NMR and (b) <sup>13</sup>C NMR of **OEJ-1** in DMSO-d<sub>6</sub>.

(a)

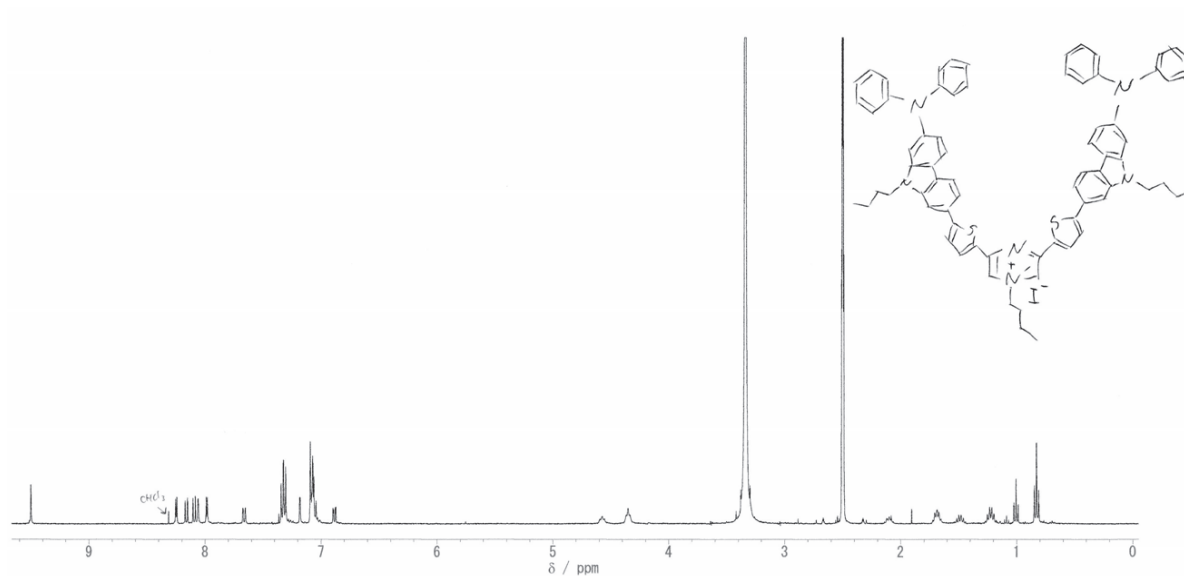

(b)

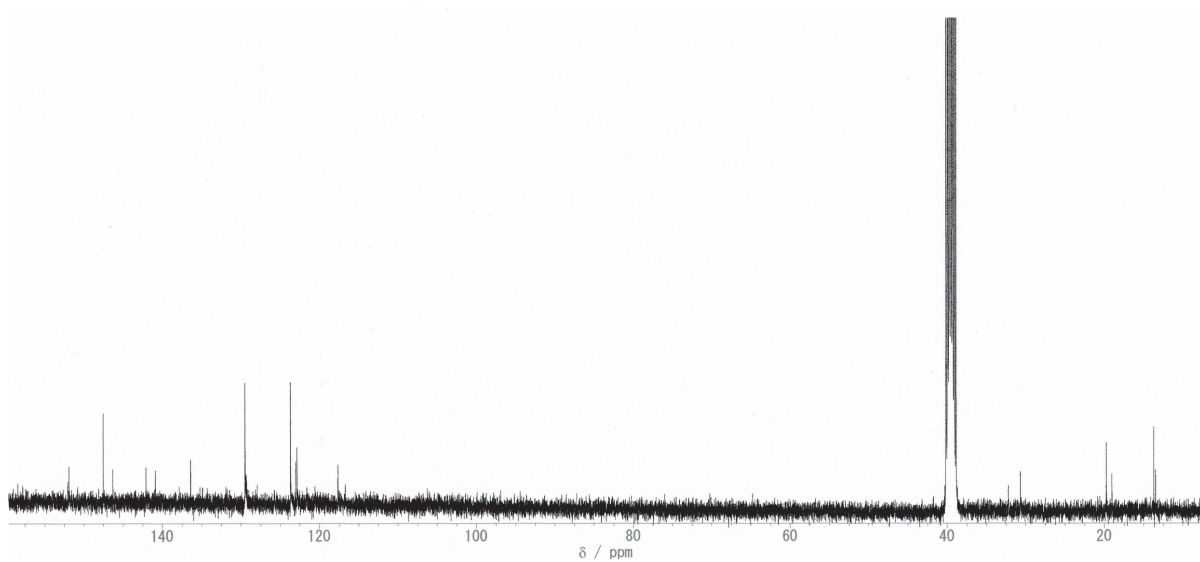

**Fig. S2** (a) <sup>1</sup>H NMR and (b) <sup>13</sup>C NMR of OEJ-2 in DMSO-d<sub>6</sub>.

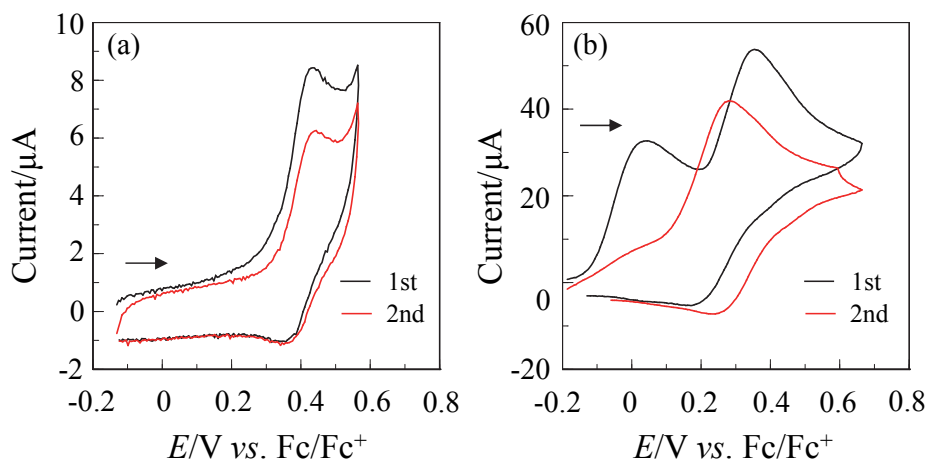

**Fig. S3** Cyclic voltammograms of (a) **OEJ-1** and (b) **OEJ-2** in acetonitrile containing 0.1 M  $\text{Bu}_4\text{NClO}_4$  at the first and the second cycles. The arrow denotes the direction of the potential scan.

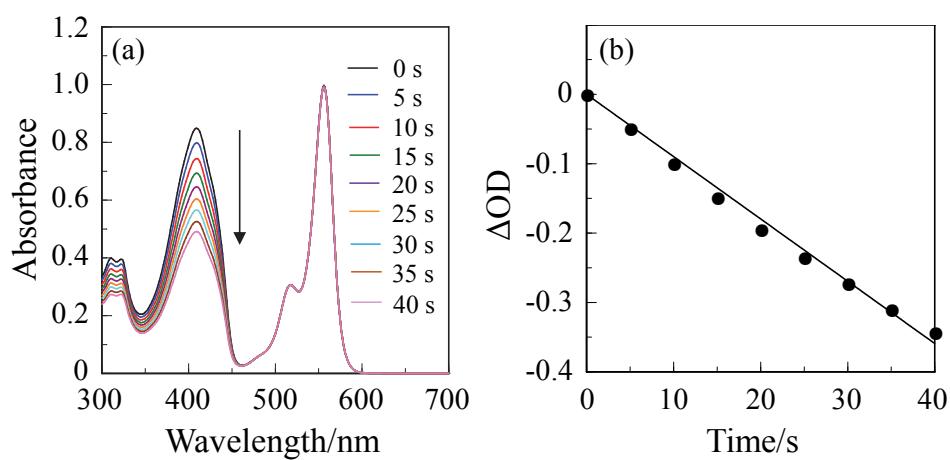

**Figs. S4** (a) Photoabsorption spectral change and (b) plot of  $\Delta\text{OD}$  for DPBF against the photoirradiation time for the photooxidation of DPBF ( $4.11 \times 10^{-5}$  M) using Rose Bengal ( $1.35 \times 10^{-5}$  M) as photosensitizer under photoirradiation with 509 nm ( $160 \mu\text{W cm}^{-2}$ ) in methanol.

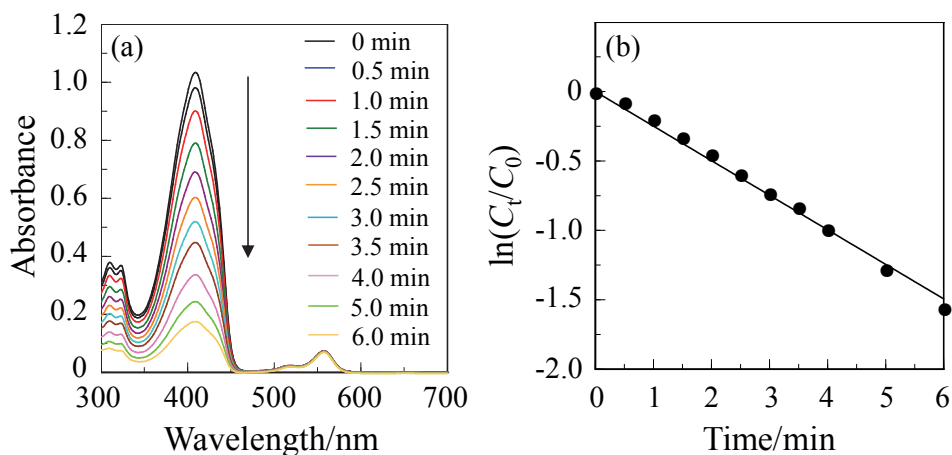

**Fig. S5** (a) Photoabsorption spectral change and (b) plot of  $\ln(C_t/C_0)$  for DPBF against the photoirradiation time for the photooxidation of DPBF ( $C_0 = 5.0 \times 10^{-5}$  M) using Rose Bengal ( $1.0 \times 10^{-6}$  M) as photosensitizer under photoirradiation with visible light ( $> 510$  nm,  $14 \text{ mW cm}^{-2}$ ) in methanol.

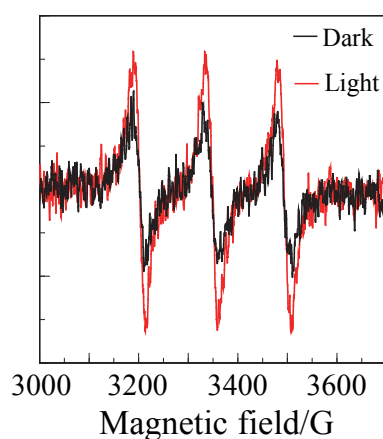

**Fig. S6** The ESR spectra of 4-oxo-TEMPO which is formed by the reaction of 4-oxo-TEMP with  $^1\text{O}_2$  which was generated by **OEJ-2** under irradiation with visible light (temperature 298 K, microwave power 1 mW, microwave frequency 9.439 GHz, field modulation 0.2 mT at 100 kHz, and scan time 4 min). The air-saturated THF solution containing **OEJ-2** (0.01 mM) as the photosensitizer and 4-oxo-TEMP (50 mM) as the spin-trapping agent was irradiated with visible light ( $> 510$  nm,  $14 \text{ mW cm}^{-2}$  for 30 min) obtained by passage of xenon light through a 510 nm long path filter.

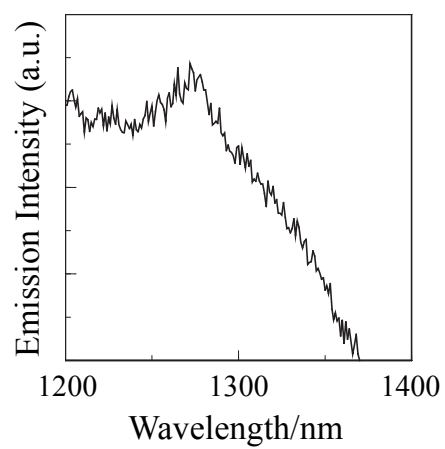

**Fig. S7** Phosphorescence spectrum of  $^1\text{O}_2$  produced upon the excitation of **OEJ-2** (0.07 mM) at 467 nm in THF.
